March 2014

# PSYCHIATRIC SERVICES

A Journal of the  
American Psychiatric  
Association

- ◆ Housing and Recovery:  
Three Literature Reviews  
Assess the Evidence Base
- ◆ Integrating Care for  
Louisiana Residents  
After the Gulf Oil Spill
- ◆ Antipsychotic Prescribing  
Among U.S. Physicians:  
2002–2007 Data Analysis
- ◆ Evidence-Based Reduction  
of Seclusion and Restraint:  
A U.S. Multisite Evaluation

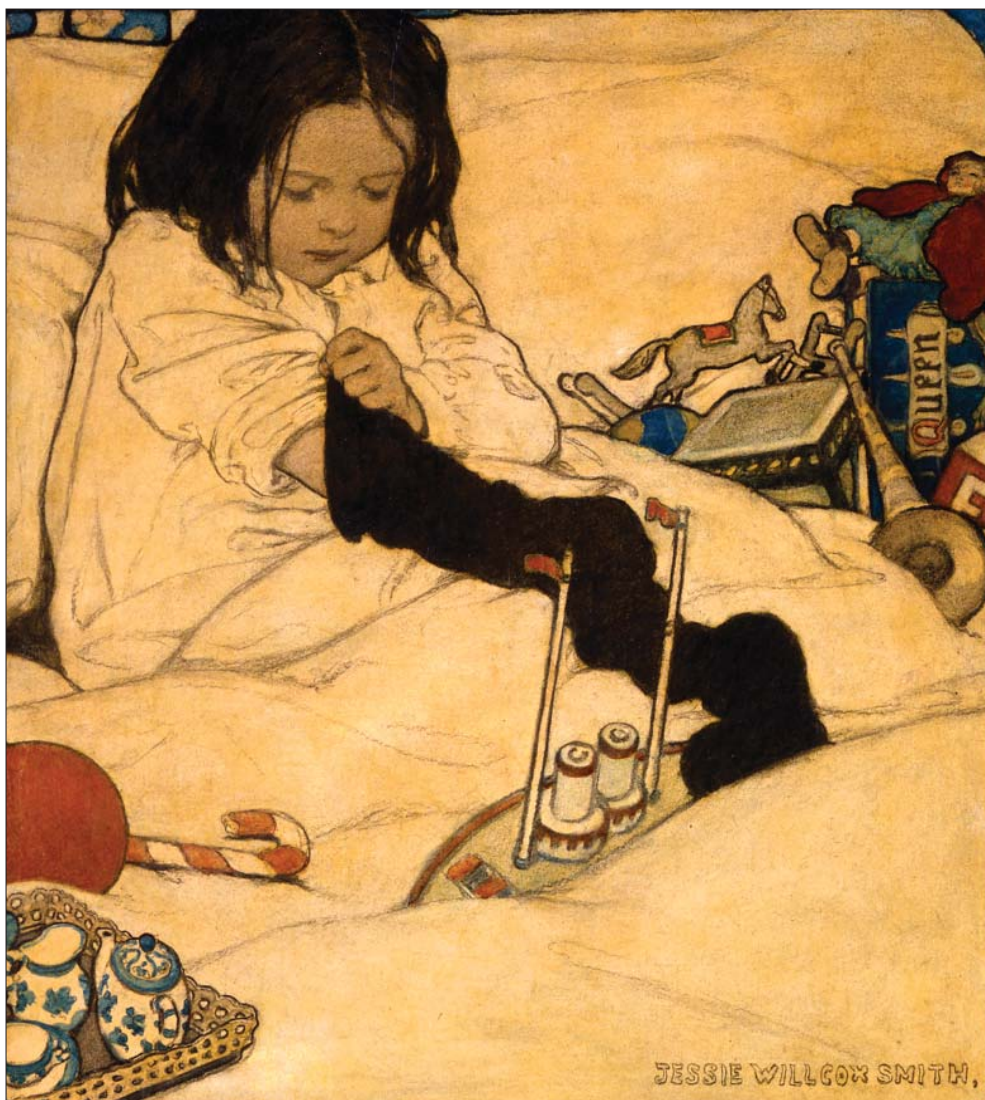

Source: https://psychiatryonline.org/doi/suppl/10.1176/ps.2014.65.issue-3/suppl_file/cover.pdf
